# Supplementary material for: Antibody and antibody fragments site-specific conjugation using new Q-tag substrate of bacterial transglutaminase
Source: PubMed Central journal article supplement (PMC10869684; doi:10.1038/s41420-024-01845-3), 2024-02-15

Figure 2 A)

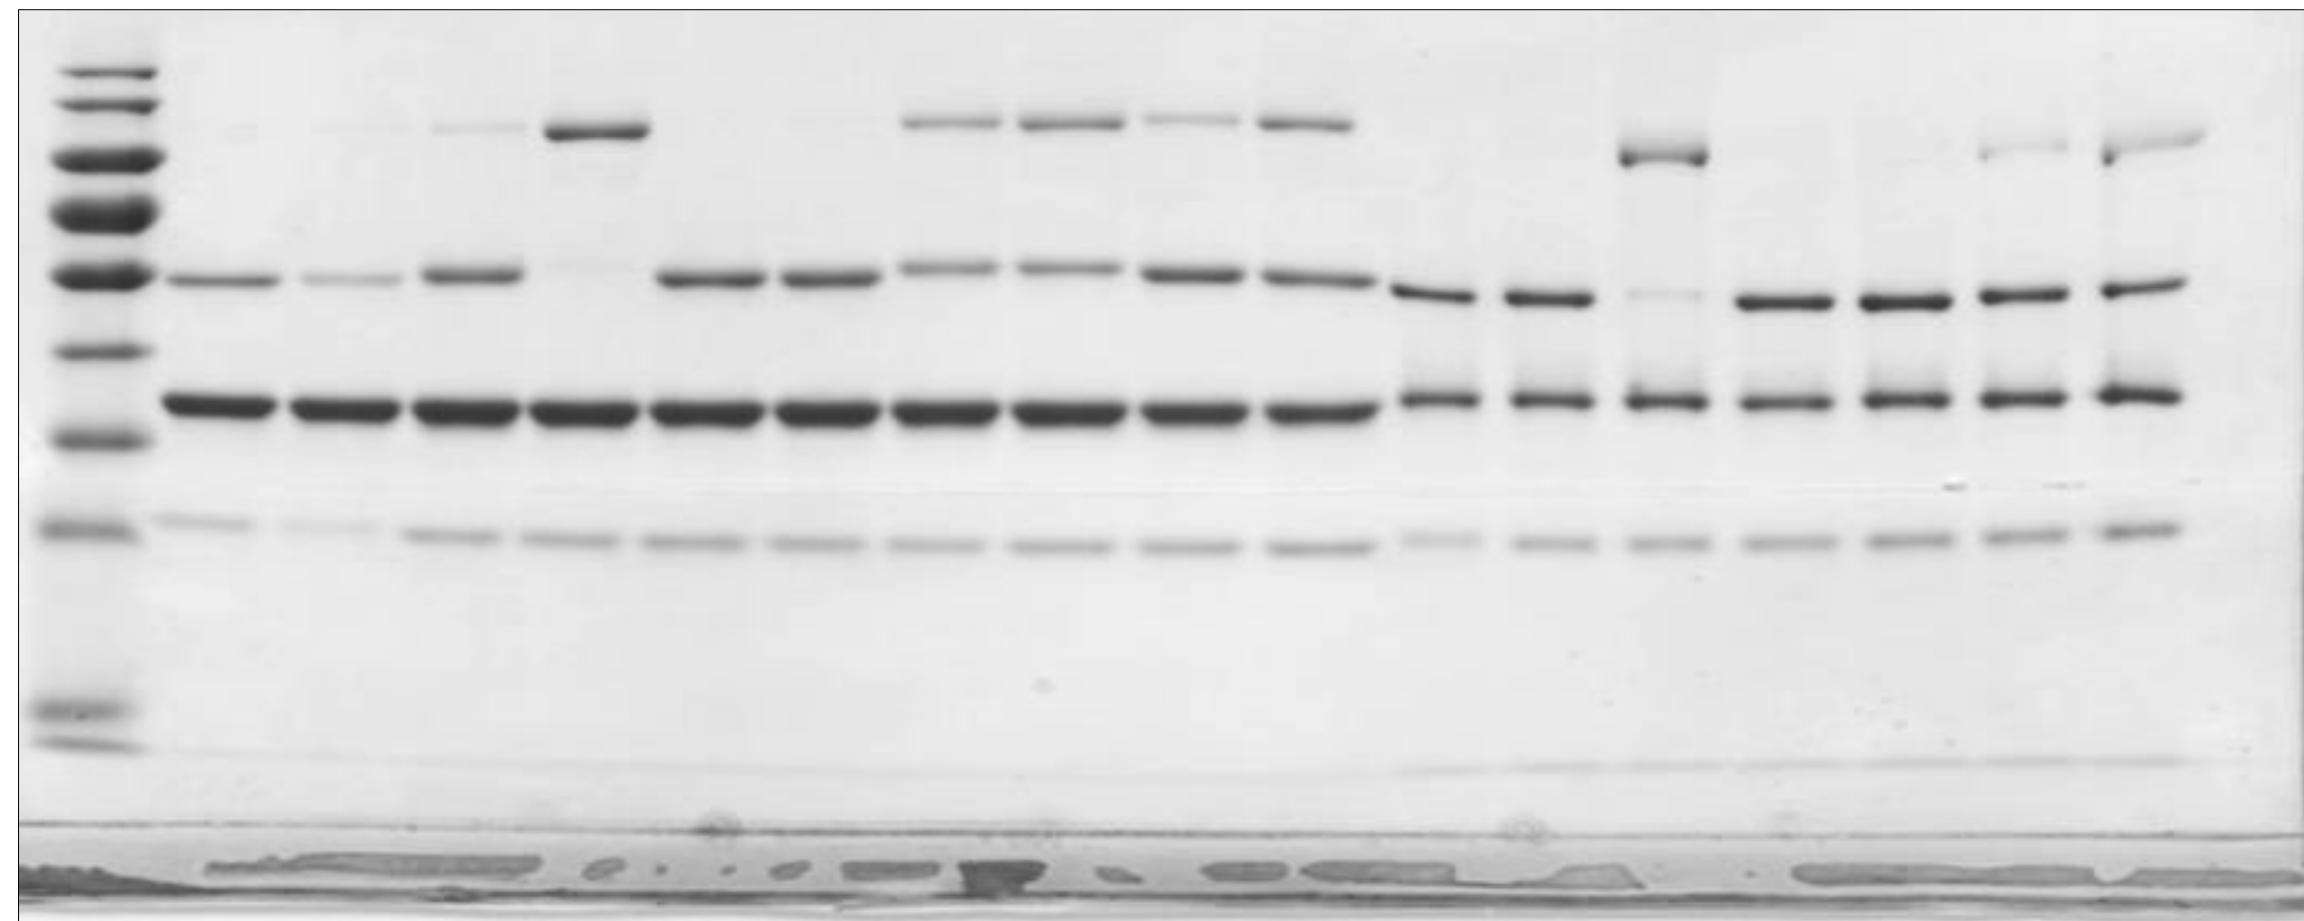

Figure 2 B)

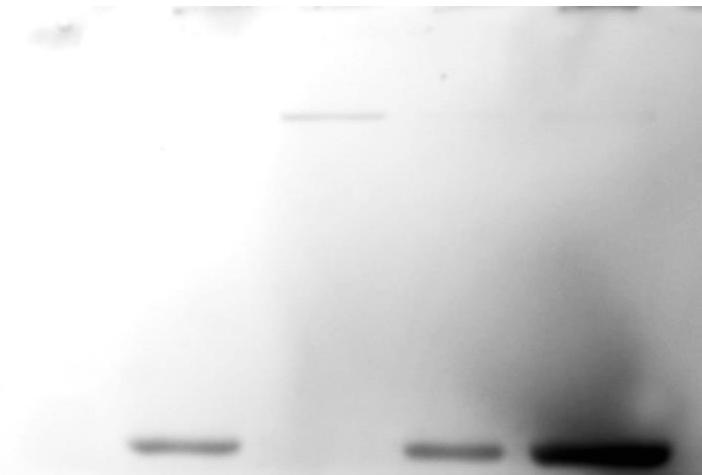

Figure 2 C)

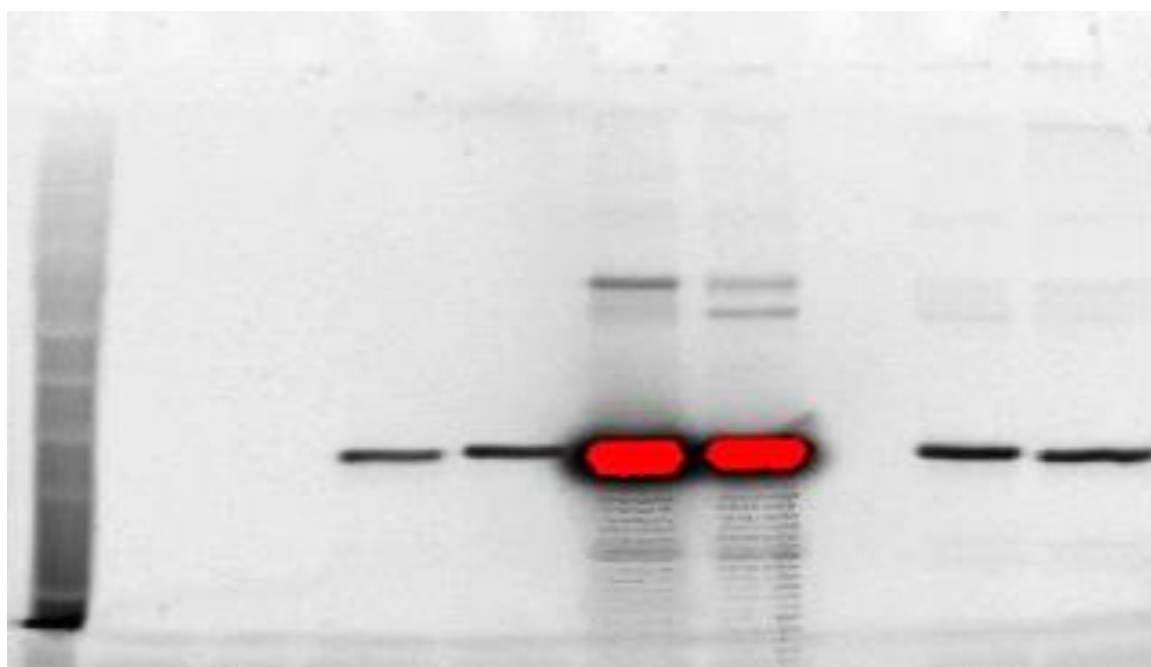

Figure 2 D)

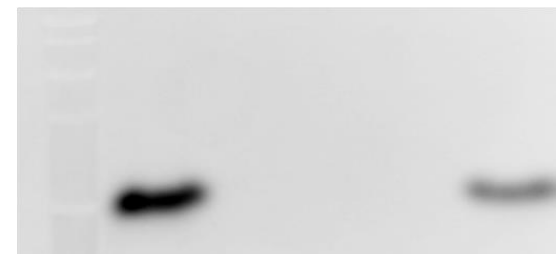

Supplement: 41420_2024_1845_MOESM3_ESM.pdf [file 41420_2024_1845_MOESM3_ESM.pdf]
